# Supplementary material for: A Genome Wide Association Study Revealed Key Single Nucleotide Polymorphisms/Genes Associated With Seed Germination in Gossypium hirsutum L
Source: Front Plant Sci. 2022 Mar 16;13:844946. doi: 10.3389/fpls.2022.844946 (PMC8967292; doi:10.3389/fpls.2022.844946)
Supplement: Supplementary file 4 [file Table_2.xlsx]

## Sheet: Table S3
Table S2. List of 92 significantly associated SNPs with germination related traits
Number	SNP	Ref	Alt	MAF	AV_GP	AV_GI	AV_GR	AV_VI	Nums
1	A01:19746441	G	A	0.226	5.87073	-	-	-	1
2	A01:47655688	A	G	0.5	-	-	-	5.01609	1
3	A01:77149863	G	A	0.068	-	6.00414	5.0603	-	2
4	A01:77149864	C	A	0.067	-	6.0006	5.30076	-	2
5	A01:77149868	G	A	0.069	-	6.16757	-	-	1
6	A01:77149876	C	G	0.065	-	6.23895	5.23805	-	2
7	A01:77149877	A	T	0.064	-	5.9704	5.07183	-	2
8	A01:8019277	T	C	0.279	5.10302	-	-	-	1
9	A02:3822482	T	G	0.125	5.05627	-	-	-	1
10	A02:63930775	T	C	0.133	5.41791	-	-	-	1
11	A03:29337553	G	T	0.13	-	-	5.13136	-	1
12	A03:60268552	T	C	0.499	-	-	5.08519	-	1
13	A03:68466784	A	G	0.138	-	5.16912	-	-	1
14	A03:8740574	G	A	0.081	-	-	5.85072	-	1
15	A04:47108236	G	A	0.122	-	5.42299	-	-	1
16	A05:81655281	C	G	0.065	-	5.15001	5.35076	-	2
17	A06:100292365	A	G	0.496	-	5.44924	-	-	1
18	A06:4229300	C	A	0.478	-	-	-	5.3132	1
19	A06:66982849	T	C	0.436	-	-	-	5.67918	1
20	A06:70086346	A	G	0.477	-	5.13647	-	-	1
21	A06:81403942	T	C	0.178	-	-	-	5.08821	1
22	A06:91058248	T	C	0.27	-	-	-	6.02632	1
23	A07:58667580	T	C	0.174	-	5.47145	-	-	1
24	A08:28588249	T	C	0.163	-	5.82759	-	-	1
25	A08:31410870	T	C	0.164	-	5.12826	6.54629	-	2
26	A08:34320010	T	C	0.18	-	-	-	5.37007	1
27	A08:34342486	G	A	0.177	-	-	5.14771	-	1
28	A08:38634341	G	A	0.17	-	-	-	5.23532	1
29	A08:43554396	C	T	0.169	-	-	-	5.51285	1
30	A08:44107257	G	A	0.152	-	-	5.08274	-	1
31	A08:44955365	A	G	0.168	-	-	-	5.12395	1
32	A08:48500728	T	C	0.136	5.57448	-	-	-	1
33	A08:53420953	G	A	0.164	-	-	-	5.98745	1
34	A08:53492125	G	A	0.163	-	5.48112	5.50112	-	2
35	A08:57987048	A	G	0.05	-	-	5.44467	-	1
36	A09:28664611	G	A	0.061	-	5.13044	-	-	1
37	A09:61304606	A	G	0.128	-	-	-	5.09359	1
38	A09:68204534	T	C	0.249	-	-	5.50056	-	1
39	A09:68206391	C	T	0.257	-	-	5.1656	-	1
40	A09:68240653	A	G	0.21	-	-	5.06773	6.05277	2
41	A09:68240905	T	G	0.233	-	-	-	5.14213	1
42	A09:68243341	C	T	0.247	-	-	-	5.68794	1
43	A09:68248823	A	G	0.241	-	-	-	5.20166	1
44	A09:68249426	C	T	0.268	-	-	-	5.25784	1
45	A09:68251945	A	G	0.259	-	-	-	5.04361	1
46	A09:68255111	A	G	0.236	-	-	-	5.08897	1
47	A09:68255593	A	G	0.261	-	-	-	5.30361	1
48	A09:68255852	C	A	0.27	-	-	5.00806	5.15145	2
49	A09:68257689	G	A	0.255	-	-	-	5.48513	1
50	A09:68257736	C	T	0.257	-	-	-	5.26792	1
51	A09:68257790	C	T	0.251	-	-	-	5.00428	1
52	A09:68257990	T	C	0.247	-	-	5.22724	5.79527	2
53	A09:68258308	C	A	0.254	-	-	-	5.55588	1
54	A09:68258389	A	G	0.257	-	-	5.57843	5.36009	2
55	A09:68259210	T	A	0.253	-	-	-	5.18886	1
56	A10:73015178	T	C	0.065	-	5.57722	5.4833	-	2
57	A10:96370055	A	C	0.425	-	-	-	6.08646	1
58	A11:1681226	T	C	0.079	-	-	5.60757	-	1
59	A11:1681264	A	G	0.079	-	-	5.78405	-	1
60	A11:1681275	A	G	0.068	-	-	5.31238	-	1
61	A11:1681285	T	C	0.069	-	-	5.00248	-	1
62	A11:1681287	T	C	0.07	-	-	5.02491	-	1
63	A11:1681352	T	C	0.061	-	-	6.10239	-	1
64	A11:1681419	C	T	0.074	-	-	6.30181	-	1
65	A11:1681428	A	G	0.071	-	-	6.07697	-	1
66	A11:1681444	A	G	0.076	-	-	5.81942	-	1
67	A11:2336848	G	A	0.488	-	-	5.38009	-	1
68	A12:57807563	A	G	0.27	-	5.61249	-	-	1
69	A13:77340700	C	T	0.165	-	5.04824	-	-	1
70	D02:27961192	T	C	0.181	-	-	-	5.12953	1
71	D04:18950896	C	T	0.153	-	-	-	5.4952	1
72	D05:50875140	C	T	0.455	5.15502	-	-	-	1
73	D05:53696977	A	G	0.077	-	-	5.17495	-	1
74	D05:53697033	T	C	0.107	-	-	5.15124	-	1
75	D05:53697047	T	C	0.109	-	-	5.09853	-	1
76	D07:53259081	A	T	0.056	-	-	-	5.21875	1
77	D11:15715456	T	A	0.249	-	-	-	5.06596	1
78	D12:12630013	T	C	0.063	-	-	5.13284	-	1
79	D13:18028416	A	G	0.494	-	5.09107	5.17974	-	2
80	scaffold115_A01:120991	C	T	0.497	-	6.30591	5.38513	-	2
81	scaffold1153_A05:220726	T	G	0.136	5.06541	-	-	-	1
82	scaffold1153_A05:220750	A	G	0.1	5.08819	-	-	-	1
83	scaffold1266_A06:502813	A	G	0.223	5.82658	-	-	-	1
84	scaffold1502_A06:6108	T	A	0.079	-	5.03146	-	-	1
85	scaffold2012_A08:287247	A	G	0.159	-	-	-	5.26775	1
86	scaffold2075_A08:54463	A	G	0.165	-	-	-	5.19486	1
87	scaffold237_A02:30525	G	A	0.088	-	5.14383	-	-	1
88	scaffold237_A02:30530	A	C	0.089	-	5.38612	-	-	1
89	scaffold2671_A10:51204	A	T	0.097	5.56026	-	-	-	1
90	scaffold2937_A11:35923	A	G	0.096	-	-	-	5.71503	1
91	scaffold4815:21885	T	C	0.127	-	5.34174	-	-	1
92	scaffold626_A03:711105	T	G	0.132	-	-	-	5.64811	1
