# Supplementary material for: A Genome Wide Association Study Revealed Key Single Nucleotide Polymorphisms/Genes Associated With Seed Germination in Gossypium hirsutum L
Source: Front Plant Sci. 2022 Mar 16;13:844946. doi: 10.3389/fpls.2022.844946 (PMC8967292; doi:10.3389/fpls.2022.844946)
Supplement: Supplementary file 6 [file Table_4.xlsx]

## Sheet: Table S4
Table S4. Annotation and expression of 723 candidate genes
Number	Gene ID	Anotation	FPKM of cotyledon	FPKM of root	FPKM of seed_00h	FPKM of seed_05h	FPKM of seed_10h
1	Gh_A01G0483	silencing defective 5	0.22041	0.365261	0	0.0574295	0.0622255
2	Gh_A01G0484	AT3G15395	6.64027	4.9628	12.226	19.046	24.7446
3	Gh_A01G0485	Seven transmembrane MLO family protein	0	0.0156948	0	0	0.0833712
4	Gh_A01G0486	CBS domain-containing protein	2.36387	3.18465	45.6464	52.4534	111.009
5	Gh_A01G0487	Aluminium induced protein with YGL and LRDR motifs	311.258	108.756	3526.24	1105.56	627.506
6	Gh_A01G0488	Outer membrane OMP85 family protein	9.3276	16.5674	29.1102	5.78607	9.40217
7	Gh_A01G0489	Gh_A01G0489	89.057	3.81506	0.281051	64.208	64.2554
8	Gh_A01G0490	Gh_A01G0490	11.0461	2.59125	0	3.72937	5.33331
9	Gh_A01G0491	G protein coupled receptor	2.78172	3.13685	1.4967	1.70107	1.6075
10	Gh_A01G0492	Transducin/WD40 repeat-like superfamily protein	5.51382	7.52353	7.36691	4.14417	7.75678
11	Gh_A01G0493	Gh_A01G0493	5.95215	9.58714	17.7785	5.14311	15.7054
12	Gh_A01G0494	Protein of unknown function (DUF1218)	0.745682	6.31879	0	0.506356	0.600865
13	Gh_A01G0495	COP1-interacting protein 7	1.92071	43.7274	0.0623817	1.6447	3.47355
14	Gh_A01G0496	Toll-Interleukin-Resistance (TIR) domain family protein	0	0	0	0	0
15	Gh_A01G0497	NAC domain containing protein 2	0.6595	5.50313	0	0	0.285984
16	Gh_A01G0498	AT3G15518	0.685727	3.23943	0.505281	0.396002	0.894322
17	Gh_A01G0499	CLUB	8.27726	17.4429	2.62074	11.0375	13.7152
18	Gh_A01G0500	importin alpha isoform 4	0.161543	0.0304409	0.0871499	0.135626	0.0808881
19	Gh_A01G0501	tRNAse Z4	2.64809	1.36521	8.49672	3.82536	1.98363
20	Gh_A01G0502	S-adenosyl-L-methionine-dependent methyltransferases superfamily protein	9.16527	4.22432	0	1.12554	4.88669
21	Gh_A01G0503	HAL2-like	1.74432	1.10666	0.540422	2.86745	1.06036
22	Gh_A01G0504	AT1G52855
23	Gh_A01G0505	protein kinase family protein	7.99334	14.8898	12.1272	14.3481	18.9629
24	Gh_A01G0506	Late embryogenesis abundant (LEA) protein-related	1.11368	8.7822	0.378993	5.06877	3.44764
25	Gh_A01G0507	Late embryogenesis abundant (LEA) protein-related	0	0.190701	0	0.0988464	0.393276
26	Gh_A01G0508	Late embryogenesis abundant (LEA) protein-related	0	7.14266	0	0.394097	5.23713
27	Gh_A01G0509	Gh_A01G0509	4.62905	0.279421	0	0	0
28	Gh_A01G0510	Gh_A01G0510	0	0	0	0	0
29	Gh_A01G0511	Gh_A01G0511	0	0	0	0	0
30	Gh_A01G0512	Gh_A01G0512	0.95115	1.02833	0.950375	1.75899
31	Gh_A01G0513	AT4G27390	20.6007	4.58878	10.6626	6.86683	6.16066
32	Gh_A01G0514	Protein of unknown function (DUF761)	48.4634	9.82514	5.50863	15.7882	24.3618
33	Gh_A01G0515	HSI2-like 1	0.398344	0.532799	1.77828	0.324289	0.844731
34	Gh_A01G0516	AT4G27380	34.258	16.0563	51.338	76.1348	56.9497
35	Gh_A01G0517	Gh_A01G0517	3.84883	3.42269	2.37918	5.58184	0
36	Gh_A01G0518	myosin 2	12.9315	14.3945	20.8666	10.9719	13.8224
37	Gh_A01G0519	light-harvesting chlorophyll B-binding protein 3	6.45467	0.610559	0	0	0.127521
38	Gh_A01G0520	cyclic nucleotide-gated cation channel 4	3.54344	5.26748	8.38299	3.41547	21.8639
39	Gh_A01G0521	Dynein light chain type 1 family protein	0.266193	0	1.22848	5.24909	0
40	Gh_A01G0522	membrane-associated mannitol-induced	25.4045	19.5254	7.93876	6.77481	11.9109
41	Gh_A01G0523	Wound-responsive family protein	1.27564	0.21877	4.31362	1.68439	1.04779
42	Gh_A01G0524	Wound-responsive family protein	10.4182	14.2451	311.726	138.906	148.892
43	Gh_A01G0846	Plant protein of unknown function (DUF247)	0.149559	0.101572	0	0.0788865	0.174283
44	Gh_A01G0847	Plant U-Box 15	0.0641345	0.00879007	0	0	0.0472907
45	Gh_A01G0848	CYCLIN B2;4	2.05052	6.37891	0	0	0.252017
46	Gh_A01G0849	Small nuclear ribonucleoprotein family protein	40.7267	41.822	21.6049	43.7634	50.3085
47	Gh_A01G0850	Nucleotide-diphospho-sugar transferases superfamily protein	5.16654	3.92733	3.14044	12.6212	11.4677
48	Gh_A01G0851	Zn-dependent exopeptidases superfamily protein	6.47623	7.24931	3.97089	9.6217	7.68005
49	Gh_A01G0852	Tetratricopeptide repeat (TPR)-like superfamily protein	1.96736	0.976795	4.1832	1.50347	0.624783
50	Gh_A01G0853	AT1G42440	12.8088	14.0825	22.5488	34.1938	25.1964
51	Gh_A01G0854	Gh_A01G0854	0	0	0	0	0
52	Gh_A01G0855	HXXXD-type acyl-transferase family protein	0	0.0549779	0	0	0
53	Gh_A01G0856	Tetratricopeptide repeat (TPR)-like superfamily protein	6.45244	5.3023	1.32425	7.31402	9.75035
54	Gh_A01G0857	AT1G63610	29.0628	9.83435	4.5413	15.7178	18.3837
55	Gh_A01G0858	O-fucosyltransferase family protein	5.80997	8.13784	5.86154	7.83776	6.95625
56	Gh_A01G0859	AT1G42430	1.10071	0.61931	0	0.250642	0.121083
57	Gh_A01G0860	AT1G76250	0.717743	2.83636	0.875381	0.76713	1.63617
58	Gh_A01G0861	transcription activator-related	0.75913	0.323654	32.0961	0	0
59	Gh_A01G0862	Arabidopsis protein of unknown function (DUF241)	0	2.57879	0	0.358735	0.884415
60	Gh_A01G0863	Protein of unknown function (DUF630 and DUF632)	0.304104	0.848247	0.0518556	0.120763	0.0415706
61	Gh_A01G0864	FtsH extracellular protease family	35.6971	8.51335	6.95236	9.02623	7.09874
62	Gh_A01G0865	Arabidopsis protein of unknown function (DUF241)	0.347624	0.388834	2.28196	0.824821	1.85075
63	Gh_A01G0866	Arabidopsis protein of unknown function (DUF241)	0.324984	1.0136	26.9226	1.26462	2.55424
64	Gh_A01G0867	Putative lysine decarboxylase family protein	4.27196	1.47189	0	0.314287	1.25949
65	Gh_A01G1137	AT3G12010	14.5115	19.1489	9.45731	24.2497	25.8103
66	Gh_A01G1281	squamosa promoter binding protein-like 2	6.04519	4.2348	1.40685	2.27364	3.66224
67	Gh_A01G1282	evolutionarily conserved C-terminal region 5	0.535197	1.32495	0.524593	3.27984	2.0002
68	Gh_A01G1283	glycosylphosphatidylinositol-anchored lipid protein transfer 1	22.4561	2.55901	10.1916	17.6354	13.4713
69	Gh_A01G1284	Gh_A01G1284	5.78805	0	10.2236	3.69776	1.19011
70	Gh_A01G1285	Remorin family protein	5.12656	4.71306	1.0303	2.15367	3.40973
71	Gh_A01G1286	DEAD/DEAH box RNA helicase family protein	0.412444	1.97701	4.0014	1.35579	0.429276
72	Gh_A01G2101	Outer arm dynein light chain 1 protein	7.4291	16.3417	1.07152	3.9443	8.25617
73	Gh_A02G0294	PLAT/LH2 domain-containing lipoxygenase family protein	0.287059	6.16261	0.313139	0.1046	0.300229
74	Gh_A02G0295	photosystem I subunit D-2	310.313	33.3595	1.03195	0.647518	5.40388
75	Gh_A02G0296	Copper amine oxidase family protein	1.89078	6.21075	0	0	0.475235
76	Gh_A02G0297	Copper amine oxidase family protein	1.40538	1.24731	0	0	0.142439
77	Gh_A02G0298	Sec14p-like phosphatidylinositol transfer family protein	1.16651	3.69325	0	0.148065	1.1015
78	Gh_A02G0299	Gh_A02G0299	0	9.93228	0	0	0
79	Gh_A02G0300	with no lysine (K) kinase 1	20.6891	8.01958	24.2022	8.09805	11.5111
80	Gh_A02G0301	UDP-Glycosyltransferase superfamily protein	5.17169	1.49031	0	1.21444	2.16733
81	Gh_A02G0302	AT1G54520	0	0	0	0	0
82	Gh_A02G0303	glucan synthase-like 5	0	0.0466266	0.0932275	0	0.0398156
83	Gh_A02G0304	glucan synthase-like 5	0	0	0	0	0
84	Gh_A02G0305	Acyl-CoA N-acyltransferase with RING/FYVE/PHD-type zinc finger protein	9.00891	10.2802	31.8912	5.02406	7.1181
85	Gh_A02G0306	FRIGIDA-like protein	15.9521	20.7641	8.89864	14.4238	13.7652
86	Gh_A02G0307	Ribosomal L18p/L5e family protein	2.45871	1.45215	14.0088	6.61091	6.37943
87	Gh_A02G0308	glucan synthase-like 5	0	0	2.03047	0	0
88	Gh_A02G0309	Seed maturation protein	0.40967	0.0249912	57.1639	0.975301	0.404528
89	Gh_A02G0310	yeast YAK1-related gene 1	0.690639	2.64267	2.64188	2.05239	1.71976
90	Gh_A02G0311	Gh_A02G0311	16.2371	8.07082	0	0.414097	2.51249
91	Gh_A02G0312	AT3G22520	46.7993	49.1694	12.0348	19.7007	21.1883
92	Gh_A02G0313	20S proteasome beta subunit D1	41.6792	51.4686	59.5677	75.7713	44.6301
93	Gh_A02G0314	HSP20-like chaperones superfamily protein	0.112004	0.0594841	46.289	3.06461	0.174725
94	Gh_A02G0315	NAD(P)-linked oxidoreductase superfamily protein	26.3453	4.42521	11.3159	0.19544	1.22439
95	Gh_A02G0316	Bifunctional inhibitor/lipid-transfer protein/seed storage 2S albumin superfamily protein	0.16297	0.551538	0.280235	0	0
96	Gh_A02G0317	Bifunctional inhibitor/lipid-transfer protein/seed storage 2S albumin superfamily protein	0.0283118	0.0501678	0	0	0
97	Gh_A02G0318	Bifunctional inhibitor/lipid-transfer protein/seed storage 2S albumin superfamily protein	0.348119	1.89189	4.01439	0.78743	1.37268
98	Gh_A02G0319	PLANT HOMOLOGOUS TO PARAFIBROMIN	5.05523	7.91998	11.6489	12.5508	6.32334
99	Gh_A02G0320	Acyl-CoA N-acyltransferases (NAT) superfamily protein	22.5219	11.1485	15.0897	7.98566	35.0784
100	Gh_A02G0321	Acyl-CoA N-acyltransferases (NAT) superfamily protein	1.72456	2.49011	1.27085	1.98547	3.68805
101	Gh_A02G0322	homocysteine S-methyltransferase 3	0.0479335	0.23454	9.93255	0	0
102	Gh_A02G0323	Protein kinase superfamily protein	0.238513	0.100381	0.114698	0	0
103	Gh_A02G0324	TESMIN/TSO1-like CXC 2	5.10917	5.96779	1.95562	2.84191	2.35321
104	Gh_A02G0325	Ribosomal protein S3Ae	1.55826	0.658313	0.344995	0.804398	1.41661
105	Gh_A02G0326	Ribosomal protein S3Ae	43.641	53.1259	19.897	105.774	114.16
106	Gh_A02G0327	AT4G14746	0	0	0	0	0
107	Gh_A02G0328	Plant protein of unknown function (DUF828) with plant pleckstrin homology-like region	3.7389	4.46265	2.77028	7.46689	4.34341
108	Gh_A02G0329	RmlC-like cupins superfamily protein	102.43	89.6828	110.121	132.401	90.3145
109	Gh_A02G0330	NAD(P)-linked oxidoreductase superfamily protein	0.280444	2.72092	0.937518	0.0904088	0.180574
110	Gh_A02G0331	NAD(P)-linked oxidoreductase superfamily protein	0.0343248	0.104405	0	0	0
111	Gh_A02G0332	DNA repair (Rad51) family protein	0.0305665	0.0438824	0	0	0.0827526
112	Gh_A02G0333	ATP sulfurylase 1	4.02177	21.464	20.9623	18.5261	76.3755
113	Gh_A02G0334	Gh_A02G0334	1.17502	9.32321	0.162757	0.209576	0.820605
114	Gh_A02G0335	Calcium-binding EF hand family protein	1.22399	1.07284	0.324895	1.50335	3.59194
115	Gh_A02G0336	S-adenosyl-L-methionine-dependent methyltransferases superfamily protein	13.5787	1.63299	25.3269	1.57614	2.41088
116	Gh_A02G0337	Gh_A02G0337	2.95999	1.61901	21.9039	1.89188	2.44133
117	Gh_A02G0338	AT4G14615	328.016	114.071	276.59	74.5105	103.875
118	Gh_A02G0339	CBL-interacting protein kinase 7	7.39349	19.4668	77.0819	10.651	5.4322
119	Gh_A02G0340	AUX/IAA transcriptional regulator family protein	72.2751	44.368	10.0019	95.1367	132.589
120	Gh_A02G0341	indole-3-acetic acid inducible 14	19.5946	103.361	0.700981	3.82902	10.767
121	Gh_A02G0342	AT5G43680	4.92088	4.47773	5.53045	10.6588	7.81912
122	Gh_A02G0343	basic helix-loop-helix (bHLH) DNA-binding superfamily protein	0.237582	0.222034	1.02991	2.52954	0.407723
123	Gh_A02G0344	Ribosomal protein S19 family protein	32.9543	41.015	112.258	117.402	104.837
124	Gh_A02G0345	Alba DNA/RNA-binding protein	0.0662319	0.0917722	0	0.214471	0.228019
125	Gh_A02G0346	proton gradient regulation 3	1.74334	1.52299	6.99965	3.84762	3.07649
126	Gh_A02G1152	Uncharacterised protein family (UPF0497)	0	1.36143	0	0.179529	0.37513
127	Gh_A02G1153	Integrase-type DNA-binding superfamily protein	0.301793	0.477536	0
128	Gh_A02G1740	Major facilitator superfamily protein	0	0.19186	3.162	4.39081	2.01796
129	Gh_A03G0417	Laccase/Diphenol oxidase family protein	5.19011	16.5607	0	0	1.14904
130	Gh_A03G0418	AT2G29620	0.0631487	0.186052	0.331878	0.0551746	0.115826
131	Gh_A03G0419	FTSH protease 7	7.67144	4.21119	8.68205	4.48374	5.49635
132	Gh_A03G0420	thiaminC	0.848269	0.252632	0.250953	0	0.0696568
133	Gh_A03G0421	josephin protein-related	0.306844	0.190946	0	0	0.43639
134	Gh_A03G0422	Galactose oxidase/kelch repeat superfamily protein	1.10253	0.632029	0	0.849503	0
135	Gh_A03G0423	AT3G47070	4.21872	0	0	0	0
136	Gh_A03G0424	cytochrome P450, family 86, subfamily A, polypeptide 1	0.0225837	0.573203	0.0792203	0.0615231	0
137	Gh_A03G0425	phosphate transporter 4;1	17.3127	3.32686	1.80194	2.29172	2.74529
138	Gh_A03G0426	Actin-like ATPase superfamily protein	15.2744	4.71099	32.8975	10.2602	5.27247
139	Gh_A03G0427	golgi nucleotide sugar transporter 2	4.32204	5.78757	1.78147	7.16024	4.07283
140	Gh_A03G0428	Tetratricopeptide repeat (TPR)-like superfamily protein	20.6274	7.57737	26.2794	7.36551	7.97091
141	Gh_A03G0720	AT4G21740	0.358562	2.20242	0.395993	0	0.316562
142	Gh_A03G0933	Pentatricopeptide repeat (PPR) superfamily protein	2.26128	1.60317	11.6347	2.5029	3.95255
143	Gh_A03G0934	alpha/beta-Hydrolases superfamily protein	2.10842	3.6312	1.13358	2.40565	1.26571
144	Gh_A03G0935	Chaperone protein htpG family protein	71.2488	20.3778	48.1986	61.2772	91.4416
145	Gh_A03G0936	Gh_A03G0936	0	0.254066	0.394729	0.0765562	0
146	Gh_A03G0937	basic helix-loop-helix (bHLH) DNA-binding superfamily protein	7.51721	11.2972	11.97	10.7269	7.69502
147	Gh_A03G0938	magnesium ion binding;thiamin pyrophosphate binding;hydro-lyases;catalytics;2-succinyl-5-enolpyruvyl-6-hydroxy-3-cyclohexene-1-carboxylic-acid synthases	9.60415	1.90519	7.98942	2.40792	6.66849
148	Gh_A03G0939	zinc transporter 7 precursor	0	0	0	0	0.113497
149	Gh_A03G0940	Nucleoporin interacting component (Nup93/Nic96-like) family protein	25.1657	28.0352	19.4608	28.4385	24.4432
150	Gh_A03G0941	basic leucine-zipper 58	0.0330367	0.841413	0	0.385684	0
151	Gh_A03G0942	phytosulfokine 4 precursor	0	7.82658	1.26978	0.984258	4.30368
152	Gh_A03G0943	Gh_A03G0943	24.5022	22.3555	60.663	65.0673	30.7301
153	Gh_A03G0944	Peroxidase superfamily protein	0.443128	1.44826	0.929929	0.103255	0.883289
154	Gh_A03G0945	Leucine-rich receptor-like protein kinase family protein	7.54982	2.04981	0	0.624986	2.99872
155	Gh_A03G0946	Adenosylmethionine decarboxylase family protein	198.753	230.329	465.685	228.014	236.065
156	Gh_A03G0947	conserved peptide upstream open reading frame 9	281.324	319.2	648.149	382.669	260.447
157	Gh_A03G1018	acyl carrier protein 2	0	0.608286	1.47959	0	0
158	Gh_A03G1019	SNF2 domain-containing protein / helicase domain-containing protein	4.47649	4.63562	5.21652	9.49362	7.26622
159	Gh_A03G1020	UBX domain-containing protein	8.15583	12.4035	21.2898	17.1683	12.1194
160	Gh_A03G2105	SIGNAL PEPTIDE PEPTIDASE-LIKE 3	17.3962	22.5668	14.2446	21.895	20.264
161	Gh_A04G0696	ARF-GAP domain 7	4.80116	8.14909	5.47433	6.74554	7.26341
162	Gh_A04G0697	cation/H+ exchanger 20	0.358961	0.0702056	0	0	0
163	Gh_A05G3145	Gh_A05G3145	0.0274486	0	0.266714	0	0
164	Gh_A05G3146	AT5G14970	18.436	7.15888	8.20319	6.50109	7.86648
165	Gh_A05G3147	galacturonosyltransferase-like 10	40.7434	28.1622	4.48878	10.6214	27.7818
166	Gh_A05G3148	SIN3-like 2	6.28469	6.30286	11.7724	6.99081	9.39187
167	Gh_A05G3149	ABC transporter family protein	0.819363	1.56503	0.0301207	0.445104	0.263814
168	Gh_A05G3150	Leucine-rich repeat protein kinase family protein	12.5561	7.07966	2.81151	2.00868	3.6357
169	Gh_A05G3151	Oxoglutarate/iron-dependent oxygenase	8.66397	7.59925	43.1928	8.03124	7.32189
170	Gh_A05G3152	Protein kinase superfamily protein	0.388069	2.13027	0.905925	2.75664	1.91118
171	Gh_A05G3153	Pathogenesis-related thaumatin superfamily protein	0	0.446895	0	0	0
172	Gh_A05G3154	Gh_A05G3154	0.250231	8.44987	0	0.116964	0.419955
173	Gh_A05G3658	Plant protein of unknown function (DUF828) with plant pleckstrin homology-like region	0	2.86812	0	0	0
174	Gh_A06G0303	Haloacid dehalogenase-like hydrolase (HAD) superfamily protein	1.57869	1.92495	0	3.58951	6.28222
175	Gh_A06G0304	Gh_A06G0304	0.619492	0.913445	2.19788	1.28224	1.95744
176	Gh_A06G0305	Gh_A06G0305	9.99187	4.02128	20.5652	7.63215	7.23212
177	Gh_A06G0306	Galactose oxidase/kelch repeat superfamily protein	0.0712094	0.0556189	0.171885	0.134136	0
178	Gh_A06G0307	related to AP2 4	122.944	88.3883	72.3246	130.278	71.6386
179	Gh_A06G0308	Transducin/WD40 repeat-like superfamily protein	13.6445	17.808	44.158	10.5221	7.2358
180	Gh_A06G0309	Sec14p-like phosphatidylinositol transfer family protein	5.69625	10.3351	0	1.19361	2.49757
181	Gh_A06G0310	Phosphoglycerate mutase family protein	0.773508	2.85418	0	0.571433	0.310675
182	Gh_A06G0311	Ankyrin repeat family protein	0	0	0	0	0
183	Gh_A06G0312	Galactose oxidase/kelch repeat superfamily protein	0.493928	1.20521	0.547424	1.7072	2.19656
184	Gh_A06G0313	trehalose-6-phosphate phosphatase	0	0	0	0	0
185	Gh_A06G1087	Cyclin D6;1	1.86574	1.50812	0.44198	0	0.748694
186	Gh_A06G1088	MYB-like 102	0.138614	0.038635	0	0	0.132931
187	Gh_A06G1112	AT4G04980	0	0.0544326	0	0	0
188	Gh_A06G1113	protein serine/threonine kinases;protein kinases;ATP binding;sugar binding;kinases;carbohydrate binding	7.06282	7.34994	40.6635	26.3966	14.0974
189	Gh_A06G1167	WRKY DNA-binding protein 65	2.33803	5.55032	7.34499	5.63332	4.92453
190	Gh_A06G1168	RAB GTPase homolog A1C	19.004	31.0052	34.4276	56.7354	35.3581
191	Gh_A06G1169	Gh_A06G1169	1.53578	0.766886	0	0.406134	0
192	Gh_A06G1170	NAD(P)-binding Rossmann-fold superfamily protein	30.6281	4.22941	1.06274	6.70759	7.45722
193	Gh_A06G1256	aldehyde dehydrogenase 7B4	38.0983	6.15522	4.82244	1.34287	3.61228
194	Gh_A06G1257	aldehyde dehydrogenase 7B4	71.2483	23.7308	16.4185	8.03514	15.8332
195	Gh_A06G1258	cation calcium exchanger 4	6.66606	7.57248	17.8116	5.59853	7.59058
196	Gh_A06G1259	Gh_A06G1259	3.95208	2.29727	0.596978	3.26185	13.1739
197	Gh_A06G1260	mitotic checkpoint family protein	3.84659	6.9631	3.55378	8.3563	10.4444
198	Gh_A06G1558	3-ketoacyl-CoA synthase 19	20.5623	4.23115	0	27.2452	68.4783
199	Gh_A06G1559	Ankyrin repeat family protein	8.3715	16.9165	79.4672	13.096	20.353
200	Gh_A06G1560	Pre-mRNA-splicing factor 3	6.73267	7.33427	10.5999	13.2457	9.10343
201	Gh_A06G1561	arginine/serine-rich zinc knuckle-containing protein 33	42.4894	55.8134	131.385	38.9911	53.1745
202	Gh_A06G1562	Leucine-rich repeat receptor-like protein kinase family protein	0.815794	0.334746	0.0422503	0	0.0381752
203	Gh_A06G1563	Pseudouridine synthase family protein	7.33584	4.51685	3.94788	2.39129	6.22393
204	Gh_A06G1564	AT2G35790	21.3488	24.1901	38.2191	61.8571	52.8383
205	Gh_A06G1565	GTP binding Elongation factor Tu family protein	5.23245	6.06796	82.3666	25.5172	17.5273
206	Gh_A06G1566	Gh_A06G1566	3.94948	1.58636	2.25103	3.93943	12.9788
207	Gh_A06G1567	IQ-domain 2	0	0
208	Gh_A06G1568	Tetratricopeptide repeat (TPR)-like superfamily protein	0	0	0	0	0
209	Gh_A06G1569	mitochondrial substrate carrier family protein	3.50488	12.1047	1.70751	5.43966	7.40592
210	Gh_A06G1570	mitochondrial substrate carrier family protein	0.234546	8.02575	0.0397309	2.60038	9.49913
211	Gh_A06G1571	Plant protein of unknown function (DUF827)	2.00233	3.0389	0.154316	0.420789	0.844125
212	Gh_A06G1572	SOS3-interacting protein 1	2.04374	2.3299	3.11708	2.27093	1.82781
213	Gh_A06G1573	HPT phosphotransmitter 4	0	0	0	0	0
214	Gh_A06G1574	HPT phosphotransmitter 4	0	0	0	0	0
215	Gh_A06G1575	HPT phosphotransmitter 4	0	0	0	0	0
216	Gh_A06G1576	Protein with RING/U-box and TRAF-like domains	0.938906	1.33891	9.50252	3.35395	1.3147
217	Gh_A06G1577	Leucine-rich repeat protein kinase family protein	3.44952	4.61154	0.0840871	1.77413	2.22064
218	Gh_A06G1578	cytochrome P450, family 716, subfamily A, polypeptide 1	1.1241	0.72797	0.0812082	0.379794	1.39751
219	Gh_A06G1579	RING/U-box superfamily protein	14.26	2.37213	0	0	0
220	Gh_A06G1580	Basic-leucine zipper (bZIP) transcription factor family protein	1.02935	0.904143	2.41487	2.21882	1.80333
221	Gh_A06G1581	Ribosomal protein S26e family protein	49.4517	64.9666	9.398	64.9271	104.19
222	Gh_A06G1582	Tetratricopeptide repeat (TPR)-like superfamily protein	2.19737	1.18426	5.12546	1.76475	2.41745
223	Gh_A06G1583	PAP/OAS1 substrate-binding domain superfamily	7.77158	2.90176	3.49365	1.9465	1.25633
224	Gh_A06G1584	Protein kinase family protein with ARM repeat domain	1.1597	2.0023	0.158244	0.522592	0.872627
225	Gh_A06G1585	WRKY DNA-binding protein 70	1.93551	12.2688	0.738476	0.114775	0.894402
226	Gh_A06G1586	Gh_A06G1586	12.1274	4.97864	3.53192	5.50722	6.98879
227	Gh_A06G1587	Gh_A06G1587	365.206	0	5.12246	3.99678	38.1299
228	Gh_A06G1588	serine/threonine protein kinase 2	16.1223	13.7606	16.7735	20.1153	20.4108
229	Gh_A06G1589	embryo sac development arrest 14	17.1864	10.7614	57.0964	43.9044	30.8107
230	Gh_A06G1590	Leucine-rich repeat protein kinase family protein	7.04184	17.0818	2.38234	6.6039	11.2353
231	Gh_A06G1591	DNAJ heat shock N-terminal domain-containing protein	6.77691	24.8392	9.57113	7.80077	7.95232
232	Gh_A06G1592	acetyl-CoA synthetase	12.3348	11.7764	1.53561	7.74066	9.49713
233	Gh_A06G1593	pigment defective 320	4.98992	3.45606	2.71647	4.77349	3.3824
234	Gh_A06G1903	Gh_A06G1903	0	0	0	0	0
235	Gh_A06G1904	Gh_A06G1904	14.3085	6.46059	8.5341	2.40494	12.1325
236	Gh_A06G1905	SPA1-related 2	8.04017	4.19893	5.93815	3.3464	7.01435
237	Gh_A06G1906	AT1G22140	95.9513	31.8623	62.8231	93.6311	170.408
238	Gh_A06G1907	Protein of unknown function (DUF581)	29.9856	18.8954	0.331054	0	3.10506
239	Gh_A06G2101	AT1G52530	5.53653	6.04819	6.14585	5.56214	4.73546
240	Gh_A07G1570	AT5G65950	5.14257	8.51023	6.20085	10.5084	9.6163
241	Gh_A07G1571	serine/threonine phosphatase 7	5.83342	8.9249	5.92671	13.6472	11.9245
242	Gh_A07G1572	TCP family transcription factor	0	0	0	0	0
243	Gh_A08G0768	Protein kinase superfamily protein with octicosapeptide/Phox/Bem1p domain	9.03999	9.55844	5.77111	8.14675	11.5584
244	Gh_A08G0769	UDP-glucosyl transferase 78D2	0	0	0	0	0
245	Gh_A08G0770	CAP (Cysteine-rich secretory proteins, Antigen 5, and Pathogenesis-related 1 protein) superfamily protein	0.193756	3.53248	0	0	0
246	Gh_A08G0771	CAP (Cysteine-rich secretory proteins, Antigen 5, and Pathogenesis-related 1 protein) superfamily protein	6.10953	5.16129	0	1.31483	3.59874
247	Gh_A08G0772	alpha/beta-Hydrolases superfamily protein	4.42583	5.10416	13.4135	6.77359	4.70071
248	Gh_A08G0779	Gh_A08G0779	0	0	0	0	0
249	Gh_A08G0780	XB3 ortholog 2 in Arabidopsis thaliana	12.6846	16.5786	6.06113	8.59004	18.8937
250	Gh_A08G0794	MAK10 homologue	3.14861	4.0327	8.62931	7.79832	8.25487
251	Gh_A08G0795	xylogalacturonan deficient 1	0	0.0931975	0	0.263799	0.257811
252	Gh_A08G0796	Calcium-dependent lipid-binding (CaLB domain) family protein	9.04268	11.4713	2.71732	11.2146	13.9907
253	Gh_A08G0816	calcium-binding EF hand family protein	0	0.0218809	0	0	0
254	Gh_A08G0817	AT2G12462	0	0.0516339	0	0	0
255	Gh_A08G0818	AT2G12462	9.43394	5.41633	4.60441	7.23723	7.02978
256	Gh_A08G0834	CCT motif family protein	1.28143	2.00995	0	0.787659	0.483718
257	Gh_A08G0835	AT5G51840	5.89279	8.18101	3.23513	5.63993	5.62823
258	Gh_A08G0836	VQ motif-containing protein	0	0	0	0	0
259	Gh_A08G0837	Plant protein of unknown function (DUF639)	2.72797	2.87908	2.62217	3.29325	4.47595
260	Gh_A08G0838	alpha/beta-Hydrolases superfamily protein	15.0195	3.48289	3.08381	5.13124	6.78682
261	Gh_A08G0840	non-intrinsic ABC protein 8	6.06956	2.58024	1.12765	1.53576	1.2018
262	Gh_A08G0841	O-Glycosyl hydrolases family 17 protein	0.050466	0.104338	0	0	0.109906
263	Gh_A08G0842	protein phosphatase 2A subunit A2	7.75974	13.0197	7.301	19.9959	17.5254
264	Gh_A08G0860	NADH-dependent glutamate synthase 1	0.136152	0.32141	0	0	0
265	Gh_A08G0861	AT5G24165	281.568	61.194	83.4465	29.2541	25.8454
266	Gh_A08G0862	spermidine synthase 3	13.3001	14.3677	9.54676	9.44633	10.2333
267	Gh_A08G0897	Dof-type zinc finger DNA-binding family protein	1.89491	5.97826	0.200759	1.56565	2.14112
268	Gh_A08G0898	vacuolar protein sorting 26B	8.68044	5.59592	3.10937	3.10615	3.50166
269	Gh_A08G0915	AT5G53620	15.6043	15.376	14.3546	17.0955	21.5506
270	Gh_A08G0916	AT5G53650	26.7877	22.0998	1.64919	39.6591	52.515
271	Gh_A08G0917	protein serine/threonine kinases;protein kinases;ATP binding;sugar binding;kinases;carbohydrate binding	0.0936325	0.299271	0.502871	0.625425	0.335421
272	Gh_A08G0918	IQ-domain 18	2.52323	2.03686	0.21446	2.00633	4.42488
273	Gh_A08G0919	heat shock protein 21	4.11135	0.443539	3.84289	1.27744	0.675884
274	Gh_A08G2409	cytokinin response factor 2	2.9856	4.6868	0	3.68776	4.13983
275	Gh_A08G2410	Gh_A08G2410	0	0	0	0	0
276	Gh_A08G2411	Protein kinase family protein	0.0300527	0.0143184	0	0.0862747	0.660085
277	Gh_A08G2412	myosin heavy chain-related	0	0	0	0	0.0330541
278	Gh_A08G2413	adenine nucleotide transporter 1	5.68007	4.66365	3.38836	16.9743	10.2559
279	Gh_A08G2414	TRICHOME BIREFRINGENCE-LIKE 23	0.137133	0.0411802	0	0	0
280	Gh_A08G2415	AT5G41810	8.76988	3.26822	0.909716	0.719685	1.7931
281	Gh_A08G2440	AT5G52960	30.6172	2.64161	2.02417	6.82881	6.4349
282	Gh_A09G0414	SCARECROW-like 8	1.69952	4.15522	17.4925	2.57024	0.940691
283	Gh_A09G0415	AT1G68350	0.0802859	1.65997	0	0	0
284	Gh_A09G0416	Homeodomain-like superfamily protein	4.43337	3.62273	37.5238	9.96441	5.01114
285	Gh_A09G1055	ABC-2 type transporter family protein	0.590899	0.218602	2.17474	0.676451	1.63116
286	Gh_A09G1056	TRAUCO	2.6659	2.75855	11.0509	6.13975	3.16348
287	Gh_A09G1057	NAD kinase 1	17.9603	16.4783	6.37387	11.8829	14.6045
288	Gh_A09G1058	Protein of unknown function (DUF604)	7.91552	4.74938	0.203473	0.954593	6.87019
289	Gh_A09G1059	Protein of unknown function (DUF3411)	1.42781	6.1613	5.98098	9.92285	4.61268
290	Gh_A09G1060	AT1G06137	0.0652738	0.327521	0	0	0
291	Gh_A09G1061	alpha/beta-Hydrolases superfamily protein	0.00824247	0.0121429	0	0	0
292	Gh_A09G1062	NAC-like, activated by AP3/PI	0	0.11717	0	0	0
293	Gh_A09G1063	AGAMOUS-like 61	0	0	0	0	0
294	Gh_A09G1064	myosin-related	0.05361	1.2117	0	0	0
295	Gh_A09G1065	Ribosomal protein S5 family protein	31.279	69.8792	25.3625	135.164	118.812
296	Gh_A09G1066	Photosystem II 5 kD protein	176.203	5.4954	3.24547	2.01231	1.1573
297	Gh_A09G1067	calmodulin-domain protein kinase 7	16.4403	20.537	26.2482	40.332	24.2103
298	Gh_A09G1068	AT3G20898	0.436696	1.35856	1.01826	0.794496	0.440679
299	Gh_A09G1069	RNA-binding (RRM/RBD/RNP motifs) family protein	13.9714	13.3619	27.4102	38.2507	23.1678
300	Gh_A09G1070	Chaperonin-like RbcX protein	0.128098	0.0312786	0	0	0
301	Gh_A09G1071	ARM repeat superfamily protein	2.33421	2.97008	8.11512	2.79706	3.3202
302	Gh_A09G1072	MATE efflux family protein	10.8065	7.34345	3.00263	1.67442	2.84144
303	Gh_A09G1073	dicarboxylate transporter 1	3.55097	17.7218	3.63585	16.3812	9.14785
304	Gh_A09G1074	myb domain protein 46	0.0632268	0.332332	0	0	0.114581
305	Gh_A09G1075	xanthine dehydrogenase 1	4.71026	5.46771	10.1764	3.22731	4.18084
306	Gh_A09G1076	arogenate dehydrogenase	3.32994	3.51467	24.413	5.09402	5.304
307	Gh_A09G1077	Integrase-type DNA-binding superfamily protein	0.0221008	0.660022	0.144695	0.786686	0.116148
308	Gh_A09G1078	AT4G12070	1.22947	2.0828	3.41165	1.25926	2.01982
309	Gh_A09G1079	Transducin/WD40 repeat-like superfamily protein	17.2498	11.973	12.3485	10.7166	9.91515
310	Gh_A09G1080	AT1G68330	0.0464977	0.11502	0	0.173	0.184487
311	Gh_A09G1081	CDPK-related kinase 1	17.1623	26.3463	16.1948	20.4192	19.7958
312	Gh_A09G1082	P-loop containing nucleoside triphosphate hydrolases superfamily protein	9.1782	9.53516	21.1153	13.7105	11.1595
313	Gh_A09G1466	DNA binding with one finger 2.4	0.174571	0.713508	0.522447	0.510067	0.198949
314	Gh_A09G1467	RING/U-box superfamily protein	10.4493	8.61307	0.658243	1.28954	10.3133
315	Gh_A09G1468	TOXICOS EN LEVADURA 2	0.154817	0.478675	0	0	0.24543
316	Gh_A09G1469	heat shock cognate protein 70-1	5.15839	37.9466	334.166	201.071	67.9177
317	Gh_A09G1470	Gh_A09G1470	2.08602	2.96361	1.07944	0.42065	1.18016
318	Gh_A09G1471	AT5G02520	0.770119	0.750618	0.628679	1.22118	0.980782
319	Gh_A09G1472	ARF-GAP domain 6	0.172409	0.222357	0	0.0664189	0.216216
320	Gh_A09G1473	NAD(P)-binding Rossmann-fold superfamily protein	10.6522	1.57961	1.36831	1.27908	3.24292
321	Gh_A09G1474	AT2G37530	2.11702	1.7506	1.19893	0.462134	0.453197
322	Gh_A09G1475	Major facilitator superfamily protein	9.77868	13.7331	0.200035	3.04209	3.58293
323	Gh_A09G1476	Acyl-CoA N-acyltransferase with RING/FYVE/PHD-type zinc finger domain	5.68071	7.45556	1.67678	4.5097	6.28746
324	Gh_A09G1477	arginine biosynthesis protein ArgJ family	3.93091	3.55169	1.65678	4.76388	4.8768
325	Gh_A09G1478	AT3G53670	129.802	75.0746	103.107	38.3215	37.8188
326	Gh_A09G1479	AT3G53630	3.55616	4.25484	36.2037	19.5837	10.3411
327	Gh_A09G1480	pyrophosphorylase 4	13.1079	21.438	21.9734	21.402	13.9737
328	Gh_A09G1481	RAB GTPase homolog 8	21.8392	39.1705	28.5068	32.9479	39.865
329	Gh_A09G1482	Gh_A09G1482	0	0.189137	0	0	0
330	Gh_A09G1483	nodulin MtN21 /EamA-like transporter family protein	9.17987	0.874374	0.110531	0.0861017	1.85103
331	Gh_A09G1484	DNAse I-like superfamily protein	2.24402	2.11383	0	1.46799	2.95219
332	Gh_A09G1485	C2H2 and C2HC zinc fingers superfamily protein	1.56888	0.819542	5.14266	3.31971	3.7913
333	Gh_A09G1486	C2H2 and C2HC zinc fingers superfamily protein	0.632535	0.0449701	0	4.95341	4.12984
334	Gh_A09G1487	Plant protein 1589 of unknown function	0	1.28447	1.38568	0	0.672242
335	Gh_A09G1488	AT3G53540	0.935018	3.67418	0.674287	0.900929	0.890109
336	Gh_A09G1489	Pectin lyase-like superfamily protein	7.78537	5.31333	3.60906	9.15121	7.68271
337	Gh_A09G1490	Ankyrin repeat family protein	0.0203607	0.24097	0	0	0
338	Gh_A09G1491	ankyrin-like1	4.97915	3.71846	1.90617	2.68979	1.14237
339	Gh_A09G1492	AT2G39370	1.54295	1.07734	1.57393	1.33187	2.48559
340	Gh_A09G1493	Lipin family protein	0.762759	1.88931	0.216988	0.405126	1.08683
341	Gh_A09G1494	Lung seven transmembrane receptor family protein	18.236	52.5282	8.95679	33.7293	34.7721
342	Gh_A09G1495	AT5G02640	0.43269	0.125325	0	0.29274	0.344236
343	Gh_A09G1496	ABC-2 type transporter family protein	0.118705	0.244998	0	0	0
344	Gh_A09G1497	Tetratricopeptide repeat (TPR)-like superfamily protein	1.41299	1.31861	2.87844	3.52167	4.59593
345	Gh_A09G1498	AT2G37300	1.14141	0.425674	0	0.126449	0.135873
346	Gh_A09G1499	Protein phosphatase 2C family protein	6.14128	3.72334	0.327178	0.508399	2.26349
347	Gh_A09G1500	AT5G02770	12.1844	12.1449	28.736	14.6929	7.23145
348	Gh_A09G1501	Glutathione S-transferase family protein	67.5877	135.899	7.30288	33.7336	18.2176
349	Gh_A09G1502	pseudo-response regulator 7	39.3561	33.6853	34.9615	24.0239	29.5459
350	Gh_A09G1503	Thioredoxin superfamily protein	21.9404	2.57978	1.30122	2.46855	2.15597
351	Gh_A09G1504	Homeodomain-like superfamily protein	6.97881	4.82438	4.22611	2.84432	2.40423
352	Gh_A09G1505	AT5G02020	8.67379	1.33142	0.336986	0.261826	0.470576
353	Gh_A09G1506	Bifunctional inhibitor/lipid-transfer protein/seed storage 2S albumin superfamily protein	0.614603	19.3395	0	0	0.459394
354	Gh_A09G1507	RHO guanyl-nucleotide exchange factor 7	4.40436	1.81188	0.177536	1.4266	1.99969
355	Gh_A09G1508	glutathione S-transferase TAU 8	69.3096	10.8403	1.11597	332.169	357.89
356	Gh_A09G1509	glutathione S-transferase TAU 8	786.871	987.908	76.2808	2036.29	2819.24
357	Gh_A09G1510	glutathione S-transferase TAU 8	35.9757	11.2046	120.261	24.5606	4.64312
358	Gh_A09G1511	AT3G54000	3.80436	10.8208	58.1931	32.7519	13.5662
359	Gh_A09G1512	FKBP-type peptidyl-prolyl cis-trans isomerase family protein	6.78132	7.6603	4.33119	6.13038	7.00916
360	Gh_A09G1513	Gh_A09G1513	0.129034	0	0	0	0.251634
361	Gh_A09G1514	HSP20-like chaperones superfamily protein	58.3278	29.4344	0	0.693453	6.63771
362	Gh_A09G1515	Protein of unknown function (DUF3527)	3.2919	5.50004	0.723364	2.81825	3.16775
363	Gh_A09G1516	Nuclear transport factor 2 (NTF2) family protein	10.1183	1.82164	4.74026	5.82206	3.8271
364	Gh_A09G1517	RING/U-box superfamily protein	7.89905	6.17289	23.5482	11.0884	7.80744
365	Gh_A09G1518	defective in exine formation protein (DEX1)	19.6337	24.2155	15.7062	38.4514	29.1012
366	Gh_A09G1519	Protein of unknown function (DUF962)	12.6805	10.1511	20.6428	7.8134	4.95188
367	Gh_A09G1520	phosphate transporter 4;2	2.66192	3.90847	0.682297	1.99376	2.02351
368	Gh_A09G1521	Transducin/WD40 repeat-like superfamily protein	0	0	0	0	0
369	Gh_A09G1522	Transducin/WD40 repeat-like superfamily protein	0.155097	1.26401	0.142694	0.0553887	0.092024
370	Gh_A09G1523	peptide transporter 1	1.24172	7.47197	3.04526	3.9401	2.12444
371	Gh_A09G1524	Nodulin MtN3 family protein	0.782014	3.31545	0	0	0
372	Gh_A09G1525	Duplicated homeodomain-like superfamily protein	3.47421	0.421757	0	5.64556	4.60377
373	Gh_A09G1526	AT3G09032	2.09538	0.988686	0.929555	0.3541	0.387177
374	Gh_A09G1527	S-adenosyl-L-methionine-dependent methyltransferases superfamily protein	11.7535	13.4533	16.2498	26.9104	19.0737
375	Gh_A09G1528	glycerol-3-phosphate acyltransferase 6	46.5372	23.907	0	8.16201	30.4565
376	Gh_A09G1529	plasma membrane intrinsic protein 1;4	88.598	94.6067	0.686312	8.58836	45.0937
377	Gh_A10G1370	Protein of unknown function (DUF640)	0.0761709	0.553613	0	0	0
378	Gh_A10G1371	alpha/beta-Hydrolases superfamily protein	17.8711	9.02999	0	0.225908	1.36227
379	Gh_A10G1372	Protein kinase superfamily protein	0.885709	1.96948	0.101787	0.952885	1.1155
380	Gh_A10G1373	actin-related protein C1A	6.96563	6.64763	2.36928	7.06197	8.64743
381	Gh_A10G1374	expansin A5	0.74932	18.3186	0	0	0.277358
382	Gh_A10G1375	myb domain protein 16	7.10991	1.51905	0.946225	0.645832	2.12247
383	Gh_A10G1921	C2H2 type zinc finger transcription factor family	3.2567	4.15869	8.93778	3.41123	1.60369
384	Gh_A10G1922	Gh_A10G1922	0	0.330096	0	0	0
385	Gh_A10G1923	Gh_A10G1923	0	0	0	0	0
386	Gh_A10G1924	kunitz trypsin inhibitor 1	0.138582	0.938579	11.7251	2.04119	4.22251
387	Gh_A10G1925	Kunitz family trypsin and protease inhibitor protein	0	0.0648413	0	0	0
388	Gh_A10G1926	Kunitz family trypsin and protease inhibitor protein	0	0	0	0	0
389	Gh_A10G1927	anaphase-promoting complex subunit 8	3.89574	5.65828	4.67155	14.2274	7.89391
390	Gh_A10G1928	nodulin MtN21 /EamA-like transporter family protein	3.16127	3.18065	0.112353	0	0.184624
391	Gh_A10G1929	Cysteine/Histidine-rich C1 domain family protein	0.255567	1.13124	0	0.285223	0.77008
392	Gh_A10G1930	Cysteine/Histidine-rich C1 domain family protein	0.179343	1.25079	0	0	0
393	Gh_A10G1931	2-oxoglutarate dehydrogenase, E1 component	0	0	0	0	0
394	Gh_A10G1932	RAB GTPase homolog 8A	5.66487	1.85848	2.93347	0.948438	1.5268
395	Gh_A10G1933	zinc knuckle (CCHC-type) family protein	0.150686	0.202306	0.406446	0.396528	0.239824
396	Gh_A10G1934	AT3G12590	3.02576	4.3077	26.0455	5.01103	4.56827
397	Gh_A10G2321	F-box family protein	9.04277	5.07697	8.47442	8.1141	10.7334
398	Gh_A11G0138	polyubiquitin 10	33.9066	27.1539	26.2562	39.9134	36.8282
399	Gh_A11G0139	homeobox 7	0	0	0	0	0
400	Gh_A11G0140	CTC-interacting domain 11	22.1453	14.999	6.92982	16.1112	14.6604
401	Gh_A11G0141	SER/ARG-rich protein 34A	5.06499	4.68241	2.95985	3.31139	6.87822
402	Gh_A11G0142	pseudo-response regulator 5	1.87266	0.273968	48.0586	0.25352	0.106056
403	Gh_A11G0143	Late embryogenesis abundant (LEA) hydroxyproline-rich glycoprotein family	2.14958	9.21121	0.550046	1.29304	2.04601
404	Gh_A11G0144	AT5G24460	5.49505	5.71725	46.8644	15.4517	10.408
405	Gh_A11G0145	AT5G54150	1.16467	1.06676	1.21379	0.565341	1.25208
406	Gh_A11G0146	AT3G49490	0.00558647	0	0	0	0
407	Gh_A11G0147	TCV-interacting protein	11.2481	8.18546	33.264	8.27801	7.64145
408	Gh_A11G0148	serine protease inhibitor, Kazal-type family protein	0.0540085	0	1.01767	0	0
409	Gh_A11G0149	Mitochondrial import inner membrane translocase subunit Tim17/Tim22/Tim23 family protein	19.1866	7.67316	37.4202	24.2537	23.9014
410	Gh_A11G0150	Protein kinase superfamily protein	0.030291	2.63535	0.205617	0	0.25382
411	Gh_A11G0151	TMPIT-like protein	6.46719	5.2615	7.69684	12.5438	13.8285
412	Gh_A11G0152	RING/U-box superfamily protein	2.96801	1.61483	0.759667	0.197322	0.380089
413	Gh_A11G0153	Ribosomal protein L6 family	32.4634	57.3261	52.1673	102.062	114.856
414	Gh_A11G0154	Nucleoporin autopeptidase	8.88286	9.27541	16.7036	5.46	6.04019
415	Gh_A11G0155	plastid ribosomal protein l11	198.925	19.075	25.8605	22.6264	64.4839
416	Gh_A11G0156	Polyketide cyclase/dehydrase and lipid transport superfamily protein	10.4036	14.3952	79.7007	7.72813	13.8309
417	Gh_A11G0157	Glycosyl hydrolase superfamily protein	2.63348	14.5582	0.111383	1.30511	8.44404
418	Gh_A11G0158	CTC-interacting domain 11	18.5915	28.1294	9.15446	13.8807	15.7019
419	Gh_A11G0159	Gh_A11G0159	38.6297	40.7526	15.8141	24.5641	15.7864
420	Gh_A11G0160	CTC-interacting domain 12	7.44632	11.2597	5.45877	8.1553	9.48352
421	Gh_A11G0161	Lung seven transmembrane receptor family protein	36.1704	98.0636	47.958	66.0515	81.9698
422	Gh_A11G0162	Lung seven transmembrane receptor family protein	0	0	0	0	0
423	Gh_A11G0163	Lung seven transmembrane receptor family protein	0.0274593	0.0274323	0	0	0
424	Gh_A11G0164	CTC-interacting domain 11	14.8896	17.5994	4.60928	15.3818	18.4438
425	Gh_A11G0165	alpha/beta-Hydrolases superfamily protein	6.84862	3.61772	0.094052	5.74803	22.4181
426	Gh_A11G0166	esterase/lipase/thioesterase family protein	13.9575	2.91441	0	0.713312	0.548544
427	Gh_A11G0167	Protein of unknown function, DUF538	1.01424	21.0679	0	0.252702	0.266835
428	Gh_A11G0168	Ypt/Rab-GAP domain of gyp1p superfamily protein	6.00465	6.68678	5.26226	8.27268	8.43412
429	Gh_A11G0169	Protein kinase superfamily protein	7.41692	8.98979	2.03145	6.18487	4.48614
430	Gh_A11G0170	Transducin/WD40 repeat-like superfamily protein	8.62488	7.99614	14.4414	6.72971	10.2929
431	Gh_A11G0171	Heat shock protein 70 (Hsp 70) family protein	13.6462	35.3176	15.6846	103.909	71.5394
432	Gh_A11G0172	NAD(P)-binding Rossmann-fold superfamily protein	0	0.0612534	0	0	0.208117
433	Gh_A11G0173	trehalase 1	0.346929	1.80895	0.199075	0.309535	0.425163
434	Gh_A11G0174	Heat shock protein 70 (Hsp 70) family protein	14.6937	34.248	11.7383	85.0103	58.8637
435	Gh_A11G0175	Gh_A11G0175	1.57061	12.293	0	0	0
436	Gh_A11G0176	stress-inducible protein, putative	15.4563	34.1337	383.993	80.0166	44.8237
437	Gh_A11G0177	Translation elongation factor EFG/EF2 protein	101.264	13.2305	114.329	19.2865	29.7933
438	Gh_A11G0178	AT1G62780	55.9891	5.17149	18.8766	11.4484	19.5782
439	Gh_A11G0179	receptor serine/threonine kinase, putative	17.5937	6.96733	119.412	91.7806	50.1334
440	Gh_A11G0180	thioredoxin family protein	70.6345	18.6714	54.1723	83.1148	39.2605
441	Gh_A11G0181	HSP70-interacting protein 1	5.00976	6.32945	54.8675	16.9834	6.4405
442	Gh_A11G0182	alpha/beta-Hydrolases superfamily protein	10.5495	21.3192	9.91889	3.8748	5.82379
443	Gh_A11G0183	glycine-rich protein	18.4789	22.82	93.0892	46.0965	26.8164
444	Gh_A11G0184	AT-hook motif nuclear-localized protein 1	1.43991	8.28327	51.9825	11.6219	3.99345
445	Gh_A11G0185	ACT domain repeat 8	0.264193	1.3011	0.178836	1.04664	1.04535
446	Gh_A11G0186	O-fucosyltransferase family protein	2.66086	4.78096	1.3847	2.33923	3.60683
447	Gh_A11G0187	expansin A7	0	2.09433	0	0	0
448	Gh_A11G0188	Protein of unknown function (DUF544)	0.0532084	0.0460859	0	0	0
449	Gh_A11G0189	nuclear RNA polymerase D1A	0	0	0	0	0
450	Gh_A11G0190	AT1G12650	5.61234	5.03573	16.666	34.1679	20.4273
451	Gh_A11G0191	hapless 2	0.0479734	0.105979	0.773994	0.689146	0.0455178
452	Gh_A11G0192	Zinc finger, C3HC4 type (RING finger) family protein	5.17245	5.94068	7.92112	11.1032	5.54406
453	Gh_A11G0193	Calcium-dependent lipid-binding (CaLB domain) family protein	45.0482	59.7284	5.99512	16.5348	19.5014
454	Gh_A11G0194	methyl-CPG-binding domain protein 13	0.229584	0.0955342	0.284785	1.45972	0.346972
455	Gh_A11G0195	Transcription initiation factor TFIIE, beta subunit	9.23012	7.35845	10.7715	8.59306	12.0083
456	Gh_A11G0196	Gh_A11G0196	1.12268	1.28112	0	1.06015	0
457	Gh_A11G0197	Gh_A11G0197	11.4673	10.5395	0	5.5498	9.37937
458	Gh_A11G0198	GATA type zinc finger transcription factor family protein	0	0	0	0	0
459	Gh_A11G0199	glutathione S-transferase THETA 1	12.365	12.0178	0.695405	9.39151	5.2027
460	Gh_A11G0200	glutathione S-transferase THETA 1	19.5211	6.51006	4.75017	9.28417	10.3406
461	Gh_A11G0201	bromo-adjacent homology (BAH) domain-containing protein	3.60521	3.08165	6.23145	5.38119	5.18156
462	Gh_A11G0202	basic helix-loop-helix (bHLH) DNA-binding superfamily protein	9.26763	11.3594	0.825042	1.92632	6.4497
463	Gh_A11G0203	2-oxoglutarate (2OG) and Fe(II)-dependent oxygenase superfamily protein	7.54656	10.2258	0	0	0
464	Gh_A11G0204	ubiquitin-conjugating enzyme 5	24.093	29.959	23.7104	12.0669	17.0723
465	Gh_A11G0205	homolog of xeroderma pigmentosum complementation group B 1	5.95337	4.70223	37.6566	9.21398	6.08509
466	Gh_A11G0206	brassinosteroid-responsive RING-H2	0	14.0249	0	0	0
467	Gh_A11G0207	1-aminocyclopropane-1-carboxylic acid (acc) synthase 6	0	1.31925	0	0	0.0740551
468	Gh_A11G0218	HMG (high mobility group) box protein	4.76284	24.3745	0.143434	0.386097	0.649823
469	Gh_A11G0219	Gh_A11G0219	992.289	64.2974	2.0456	2.57932	7.34838
470	Gh_A11G0220	alpha/beta-Hydrolases superfamily protein	1.66151	3.51052	0.393261	1.67779	0.660577
471	Gh_A11G0221	subtilisin-like serine protease 3	0.192768	1.01155	0	0	0
472	Gh_A11G0222	Gh_A11G0222	3.37736	3.02442	0.241395	0.947899	3.61089
473	Gh_A11G0223	Pectin lyase-like superfamily protein	24.6112	18.4776	0.183829	5.07924	12.8889
474	Gh_A11G0224	regulatory components of ABA receptor 3	14.4828	8.94293	39.8304	10.5693	9.87752
475	Gh_A11G0225	Integrase-type DNA-binding superfamily protein	11.4885	0.63289	2.45398	2.24608	9.6147
476	Gh_A11G0226	Chloroplast Ycf2;ATPase, AAA type, core	0.0855748	0	0.29107	0	0
477	Gh_A11G0227	AMP-dependent synthetase and ligase family protein	2.79067	14.1381	0.174469	0.946782	3.45159
478	Gh_A11G0228	homolog of yeast oxidase assembly 1 (OXA1)	0	0	0	0	0
479	Gh_A11G0229	AT4G23910	16.1589	14.3848	62.8746	9.97445	15.7107
480	Gh_A11G0230	Glutaredoxin family protein	18.2307	0.275794	0.571394	0.712239	0.431319
481	Gh_A11G0231	auxin response factor 9	40.9869	31.9022	47.2754	36.5155	59.9558
482	Gh_A11G0232	Bifunctional inhibitor/lipid-transfer protein/seed storage 2S albumin superfamily protein	296.341	1932.01	1.80882	376.006	672.117
483	Gh_A11G0233	Bifunctional inhibitor/lipid-transfer protein/seed storage 2S albumin superfamily protein	3.64381	364.5	2.35496	86.6757	147.837
484	Gh_A11G0234	Bifunctional inhibitor/lipid-transfer protein/seed storage 2S albumin superfamily protein	0	255.764	0.949758	175.628	141.034
485	Gh_A11G0235	Bifunctional inhibitor/lipid-transfer protein/seed storage 2S albumin superfamily protein	0	17.6283	6.11289	50.2809	13.7233
486	Gh_A11G0236	Bifunctional inhibitor/lipid-transfer protein/seed storage 2S albumin superfamily protein	8.88327	135.256	0	8.29871	17.3608
487	Gh_A11G0237	Bifunctional inhibitor/lipid-transfer protein/seed storage 2S albumin superfamily protein	1.75033	56.0463	0	1.14886	1.18239
488	Gh_A11G0238	Bifunctional inhibitor/lipid-transfer protein/seed storage 2S albumin superfamily protein	5.844	0.213958	0	0	0
489	Gh_A11G0239	Bifunctional inhibitor/lipid-transfer protein/seed storage 2S albumin superfamily protein	0.495232	353.89	0	38.3089	89.2789
490	Gh_A11G0240	OSBP(oxysterol binding protein)-related protein 2A	0.153239	0.0153287	0	0.459351	0
491	Gh_A11G0241	AT1G62520	0.183561	0.232274	0	0	0
492	Gh_A11G0242	3-ketoacyl-acyl carrier protein synthase III	5.89759	5.36625	1.8086	1.58324	2.57228
493	Gh_A11G0243	structural molecules;transmembrane receptors;structural molecules	29.043	45.2622	39.2635	54.9235	43.3309
494	Gh_A11G0244	Pentatricopeptide repeat (PPR) superfamily protein	1.25541	0.814397	2.44459	2.92157	2.0558
495	Gh_A11G0245	Matrixin family protein	0.677769	1.26528	0.126292	0.0987546	0.294944
496	Gh_A11G0246	O-fucosyltransferase family protein	5.26763	0.0800159	0	0.0571785	0.0640956
497	Gh_A11G0247	G2484-1 protein	7.67843	10.6602	11.0794	14.1167	12.7182
498	Gh_A11G0248	Ribosomal protein L23/L15e family protein	75.2449	84.9597	45.3717	226.262	201.01
499	Gh_A11G0249	Tryptophan RNA-binding attenuator protein-like	1.60076	1.69257	0	0	0.213355
500	Gh_A11G0250	alpha/beta-Hydrolases superfamily protein	1.93002	1.39067	0.597278	0.200333	0.194161
501	Gh_A11G0251	RAS 5	26.1295	58.1487	49.1961	72.2843	43.7039
502	Gh_A11G0252	Protein kinase superfamily protein	0.353172	1.16217	0.132164	0.136506	0.298812
503	Gh_A11G0253	BAX inhibitor 1	55.5033	26.2754	116.891	43.6061	30.5978
504	Gh_A11G0254	Gh_A11G0254	16.9291	9.80799	10.3371	15.1401	7.40841
505	Gh_A11G0255	Gh_A11G0255	3.20452	4.54303	4.36732	3.04865	2.47358
506	Gh_A11G0256	cationic amino acid transporter 7	0	0.157594	0	0	0
507	Gh_A11G0257	calcineurin B-like protein 1	9.75015	10.9459	58.8114	13.7036	13.5164
508	Gh_A11G0258	casein kinase II beta chain 1	5.57583	6.09896	15.6385	15.0443	11.3422
509	Gh_A11G0259	Protein kinase superfamily protein	0.570416	2.03128	1.45962	0.814653	0.90101
510	Gh_A11G0260	chloroplast beta-amylase	0.901032	2.20425	0.345208	0.107872	0.109275
511	Gh_A11G0261	SBP (S-ribonuclease binding protein) family protein	26.4402	20.9089	2.56844	1.98956	10.9332
512	Gh_A11G0262	lon protease 2	35.0051	23.5623	4.28824	4.29595	4.13173
513	Gh_A11G0263	plastidial pyruvate kinase 3	0.848329	8.54353	1.78385	8.83191	3.79315
514	Gh_A11G0264	Single hybrid motif superfamily protein	1188.78	40.6554	2.858	4.45832	17.2821
515	Gh_A11G0265	pentatricopeptide (PPR) repeat-containing protein	20.1599	4.16605	14.7933	6.29216	13.2303
516	Gh_A11G0266	NAC domain containing protein 71	0	0	0	0	0
517	Gh_A11G0267	Clathrin adaptor complexes medium subunit family protein	10.8501	16.9955	10.4377	20.1073	17.4367
518	Gh_A11G0268	AT2G35290	0	0.389682	0	0	0
519	Gh_A11G0269	Mitochondrial substrate carrier family protein	1.00302	6.1177	1.84294	6.19648	3.68966
520	Gh_A11G0270	Polyketide cyclase/dehydrase and lipid transport superfamily protein	2.40026	10.2043	0.238702	1.69094	1.08498
521	Gh_A11G0271	ARF-GAP domain 8	30.616	39.8172	37.4864	44.3782	49.6206
522	Gh_A11G0272	ubiquitin-specific protease 21	2.24627	8.50159	12.7096	3.48685	2.70929
523	Gh_A11G0273	Gh_A11G0273	24.5481	80.6648	0.221033	1.09716	3.81869
524	Gh_A11G0274	AT1G32690	3.98059	3.85564	2.85818	2.20852	1.06029
525	Gh_A11G0275	pectinesterase family protein	23.121	24.7971	10.3482	5.27485	8.41889
526	Gh_A11G0276	Ribosomal protein S4	22.3496	28.7918	28.6643	77.7485	90.0753
527	Gh_A11G0277	Regulator of chromosome condensation (RCC1) family with FYVE zinc finger domain	0.0684617	0.0141054	0.0848187	0.0660739	0.0705249
528	Gh_A11G0278	basic helix-loop-helix (bHLH) DNA-binding superfamily protein	15.7731	15.9749	5.12618	6.41879	10.4828
529	Gh_A11G0279	TEOSINTE BRANCHED, cycloidea and PCF (TCP) 14	0.284101	4.29946	1.56986	1.22862	0.902572
530	Gh_A11G0280	NAP1-related protein 2	15.6322	21.6667	69.3559	111.962	61.3895
531	Gh_A11G0281	eukaryotic release factor 1-3	1.5996	2.11014	23.4022	7.74598	1.69547
532	Gh_A11G3184	nodulin MtN21 /EamA-like transporter family protein	1.30607	0.942183	0	0	0
533	Gh_A12G0864	transcription regulators	14.7001	9.63706	17.1877	10.1632	12.6173
534	Gh_A12G0865	AT1G02070	0.17347	1.39051	0	0	0
535	Gh_A12G0866	squamosa promoter binding protein-like 10	2.62473	1.12251	0.124807	0.0975909	0.291126
536	Gh_A12G0867	squamosa promoter binding protein-like 8	0.117009	0.0759714	0	0	0.133643
537	Gh_A12G0868	Lactate/malate dehydrogenase family protein	0	0	0	0	0
538	Gh_A12G0869	carotenoid cleavage dioxygenase 7	0	0.452367	0	0	0
539	Gh_A12G0870	Integrase-type DNA-binding superfamily protein	0.146036	0.0884205	0	0	0
540	Gh_A12G0871	homeobox-leucine zipper protein 3	0.804554	0.811792	1.49117	0.526667	0.103782
541	Gh_A12G0872	ARP2/3 complex 16 kDa subunit (p16-Arc)	6.94029	4.05868	2.17318	8.43548	5.01121
542	Gh_A12G0873	ARABIDILLO-1	0	0	0.0473142	0	0
543	Gh_A12G0874	alpha/beta-Hydrolases superfamily protein	26.3478	14.1245	4.99527	6.14693	10.1847
544	Gh_A12G0875	ethylene-responsive element binding factor 13	0	0.717774	0	0	0
545	Gh_A12G0876	ethylene-responsive element binding factor 13	0	0.259037	0	0	0
546	Gh_A12G0877	ethylene-responsive element binding factor 13	0	0.637662	0	0	0
547	Gh_A12G0878	Proteasome component (PCI) domain protein	11.5032	15.0623	27.2929	39.7306	19.7608
548	Gh_A12G0879	GRAM domain family protein	0.396022	0.0528242	0	0	0
549	Gh_A13G1791	2-oxoglutarate (2OG) and Fe(II)-dependent oxygenase superfamily protein	0	0	0	0	0
550	Gh_A13G1792	2-oxoglutarate (2OG) and Fe(II)-dependent oxygenase superfamily protein	25.419	293.585	0.129209	31.4203	5.63068
551	Gh_A13G1793	Gh_A13G1793	2.69851	2.1791	3.51786	1.78086	1.6841
552	Gh_A13G1794	2-oxoglutarate (2OG) and Fe(II)-dependent oxygenase superfamily protein	12.2157	125.719	0	0.400983	0.964543
553	Gh_A13G1795	Gh_A13G1795	0	0	0	0	0
554	Gh_A13G1796	Gh_A13G1796	0	0	0	0	0
555	Gh_A13G1797	2-oxoglutarate (2OG) and Fe(II)-dependent oxygenase superfamily protein	0.0177289	0.0430196	0	0.830418	0.223515
556	Gh_A13G1798	2-oxoglutarate (2OG) and Fe(II)-dependent oxygenase superfamily protein	0.852293	0.132336	0	4.609	0.22232
557	Gh_A13G1799	LisH dimerisation motif;WD40/YVTN repeat-like-containing domain	13.7437	11.4369	29.7609	17.7736	19.8394
558	Gh_A13G1800	SET domain group 4	0.813287	1.69214	0.240518	0.934329	0.79879
559	Gh_A13G1801	Gh_A13G1801	0.456842	0	0	0	0
560	Gh_A13G1802	phytochrome A	5.54621	2.52952	2.43986	0.951761	2.54491
561	Gh_A13G1803	Aldolase-type TIM barrel family protein	14.3389	21.936	11.4677	41.9251	39.5646
562	Gh_A13G1804	MIF4G domain-containing protein / MA3 domain-containing protein	13.4603	22.1956	90.9468	39.2263	20.657
563	Gh_A13G1805	multipolar spindle 1	0.0605665	0.210919	0	0	0
564	Gh_A13G1806	TESMIN/TSO1-like CXC 2	1.03184	5.39798	0.411161	2.24286	1.51706
565	Gh_A13G1807	Cytochrome bd ubiquinol oxidase, 14kDa subunit	149.853	134.528	73.8365	123.68	154.509
566	Gh_A13G1808	hydroxyproline-rich glycoprotein family protein	19.859	25.0186	22.6006	46.7581	35.9804
567	Gh_A13G1809	Protein kinase protein with adenine nucleotide alpha hydrolases-like domain	0.0330286	0	0	0	0
568	Gh_A13G1810	cycloartenol synthase 1	0.0294521	2.59559	0	0	0
569	Gh_A13G1811	Protein kinase superfamily protein	11.6999	11.0049	5.68083	9.14502	7.87307
570	Gh_D02G1057	minichromosome maintenance (MCM2/3/5) family protein	0.799698	1.75791	1.46566	0.204791	0.923405
571	Gh_D02G1058	Glycosyl hydrolase superfamily protein	0	0	0	0	0
572	Gh_D02G1059	Malectin/receptor-like protein kinase family protein	2.9157	7.58845	3.57916	5.37323	5.20807
573	Gh_D02G1060	geranylgeranyl pyrophosphate synthase 1	20.7409	5.85141	13.5013	9.48448	3.93951
574	Gh_D02G1061	Leucine-rich repeat protein kinase family protein	1.36899	3.01193	0.265133	0.62076	1.89846
575	Gh_D02G1062	AT3G08670	3.139	5.0988	1.47438	2.0874	1.75516
576	Gh_D02G1063	nuclear shuttle interacting	14.3451	5.14965	1.90692	2.69833	4.2269
577	Gh_D02G1064	Leucine-rich repeat protein kinase family protein	2.58253	4.05627	0.588027	1.14425	2.30838
578	Gh_D02G1065	Sec14p-like phosphatidylinositol transfer family protein	0.532995	2.91075	0	0	0
579	Gh_D02G1066	RNA-binding (RRM/RBD/RNP motifs) family protein	17.0643	14.7261	9.20906	34.9881	26.6329
580	Gh_D04G0819	glutathione S-transferase (class zeta) 2	0.271544	0	0	0	0
581	Gh_D05G3237	Gh_D05G3237	8.93407	3.4141	20.1938	8.52789	5.82483
582	Gh_D05G3238	AT5G05800	6.11018	2.29855	4.20973	2.16877	3.3386
583	Gh_D05G3239	Gh_D05G3239	0.24554	0.0631525	0	0	0
584	Gh_D05G3240	ROP interactive partner 2	3.11052	3.68549	0.102449	1.82573	1.24918
585	Gh_D05G3241	DWNN domain, a CCHC-type zinc finger	0.334884	0.255636	2.90147	0.454175	0.226516
586	Gh_D05G3242	Calcium-dependent lipid-binding (CaLB domain) family protein	0.718639	1.1144	0	0.619615	0.67698
587	Gh_D05G3243	Gh_D05G3243	0.153495	0.530502	0	0	0
588	Gh_D05G3244	LRR and NB-ARC domains-containing disease resistance protein	0.351587	2.36849	0	0	0
589	Gh_D05G3245	LRR and NB-ARC domains-containing disease resistance protein	0.517315	1.59101	0	0.0649077	0.0715425
590	Gh_D05G3246	Gh_D05G3246	0.39754	4.14927	0	0	0.651103
591	Gh_D05G3247	Pentatricopeptide repeat (PPR-like) superfamily protein	1.73159	0.863343	1.17626	1.06809	1.05185
592	Gh_D05G3248	AT5G35695	2.60225	0.878774	7.20646	2.24063	1.80768
593	Gh_D05G3249	hydrolases;protein serine/threonine phosphatases	0	0	0	0	0
594	Gh_D05G3250	ARM repeat superfamily protein	6.70917	12.1702	2.74313	5.0126	10.4668
595	Gh_D05G3251	MAP kinase 19	4.87993	2.82675	11.2697	2.58516	2.38401
596	Gh_D05G3252	SART-1 family	8.67907	12.7605	31.7738	18.1964	12.8237
597	Gh_D05G3253	RING/FYVE/PHD zinc finger superfamily protein	0.638725	2.90613	0.319351	0.494629	0.446197
598	Gh_D05G3254	Gh_D05G3254	0.755182	0.559655	5.31867	2.94156	1.33124
599	Gh_D05G3255	AT3G14750	3.17016	3.70142	6.49808	6.0894	4.71924
600	Gh_D05G3256	Peroxidase superfamily protein	65.6281	6.1525	0.60347	15.087	13.7038
601	Gh_D05G3257	NB-ARC domain-containing disease resistance protein	2.30156	3.17302	1.05588	0.596501	1.70784
602	Gh_D05G3258	Gh_D05G3258	3.37763	4.44362	1.39588	3.26892	1.51069
603	Gh_D05G3259	AT1G53035	0.0586704	0.108713	0	0	0
604	Gh_D05G3260	Gh_D05G3260	260.737	24.4168	1.03116	0	0
605	Gh_D05G3323	RNA-binding (RRM/RBD/RNP motifs) family protein	11.782	10.1401	56.7664	23.1416	14.1748
606	Gh_D05G3324	AT2G31130	5.5804	5.17035	31.6086	2.89814	5.30003
607	Gh_D05G3325	Plant protein of unknown function (DUF828)	0.185695	1.07891	2.28291	0.0771375	0.0844813
608	Gh_D05G3326	Gh_D05G3326	0	0	0	0	0
609	Gh_D05G3327	isopentenyltransferase 9	11.4297	2.08138	0.953557	4.15019	8.54263
610	Gh_D05G3328	Lactate/malate dehydrogenase family protein	119.681	165.509	147.712	237.524	219.5
611	Gh_D05G3329	global transcription factor group E4	1.45837	1.29885	5.15113	2.93838	1.93006
612	Gh_D05G3330	UDP-Glycosyltransferase superfamily protein	0.0541676	1.08725	0.440507	2.74802	0.522539
613	Gh_D05G3331	CLAVATA3/ESR-RELATED 1	0	1.81973	0	2.66616	2.2567
614	Gh_D05G3332	TCP family transcription factor 4	18.5579	0.906435	2.43516	23.8548	22.8829
615	Gh_D05G3333	Gh_D05G3333	3.43901	1.13335	0	0	1.17991
616	Gh_D05G3334	NB-ARC domain-containing disease resistance protein	3.934	5.39289	0.431263	0.433716	1.20858
617	Gh_D05G3335	NB-ARC domain-containing disease resistance protein	10.0472	9.60983	5.89234	4.20113	10.6728
618	Gh_D05G3336	NB-ARC domain-containing disease resistance protein	5.28422	3.74652	4.0792	1.43917	3.13324
619	Gh_D05G3337	Uncharacterised protein family (UPF0497)	0	0	0	0	0
620	Gh_D07G2209	golgi alpha-mannosidase II	4.03989	7.89302	4.58554	9.10249	7.42219
621	Gh_D07G2210	ADP-glucose pyrophosphorylase family protein	4.48964	6.85119	2.62286	5.15231	6.42427
622	Gh_D07G2211	Cation efflux family protein	6.20529	6.79409	22.5881	10.504	8.32126
623	Gh_D07G2212	Matrixin family protein	0	0	0	0	0
624	Gh_D07G2213	Pyridoxamine 5\'-phosphate oxidase family protein	128.97	22.3099	4.32198	5.16062	7.22013
625	Gh_D07G2214	ferredoxin thioredoxin reductase catalytic beta chain family protein	20.0037	6.4307	7.90476	15.6311	8.95027
626	Gh_D07G2215	zinc finger (AN1-like) family protein	16.8802	6.24053	67.3487	32.0426	16.6061
627	Gh_D07G2216	RING/U-box superfamily protein with ARM repeat domain	0.188319	1.73077	0.31923	0.311803	0.336589
628	Gh_D07G2217	Peroxidase superfamily protein	1.3658	4.30631	0	2.47564	0.832218
629	Gh_D07G2218	senescence-associated gene 101	2.95526	5.04383	2.10744	0.952825	2.16814
630	Gh_D07G2219	transferases;sulfuric ester hydrolases;catalytics;transferases	4.07269	7.81664	4.03058	11.0583	10.3405
631	Gh_D07G2220	Gibberellin-regulated family protein	26.7115	189.598	19.2443	185.218	147.801
632	Gh_D07G2221	Heavy metal transport/detoxification superfamily protein	270.3	20.4625	16.6627	17.8324	32.8674
633	Gh_D07G2222	Ankyrin repeat family protein	14.0414	1.82139	2.35283	4.47641	9.83807
634	Gh_D07G2223	Cysteine/Histidine-rich C1 domain family protein	2.75053	3.50983	0.162148	0	0.707391
635	Gh_D07G2224	Gh_D07G2224	0	0	0	0	0
636	Gh_D07G2225	nodulin MtN21 /EamA-like transporter family protein	16.8122	10.5938	0	3.35665	7.98356
637	Gh_D07G2226	5\'-3\' exonuclease family protein	5.12018	7.05135	22.3929	7.76651	9.08851
638	Gh_D07G2227	Leucine-rich repeat protein kinase family protein	0	0.441245	0	0	0
639	Gh_D07G2228	RING/U-box superfamily protein	2.87251	9.23579	8.30343	10.3404	4.58415
640	Gh_D07G2229	Gh_D07G2229	0	0	0	0	0
641	Gh_D07G2230	NHL domain-containing protein	0.957355	1.94858	0.152224	0.888512	0.611969
642	Gh_D07G2231	Gh_D07G2231	0.23426	1.00059	2.29652	14.1795	0
643	Gh_D07G2232	aldehyde dehydrogenase 2B7	61.547	44.6738	80.7741	111.339	106.914
644	Gh_D07G2233	cyclophilin 38	34.707	4.25387	3.85555	0.528417	3.59713
645	Gh_D07G2234	Protein kinase superfamily protein	17.7034	19.4944	39.5483	18.6346	19.8122
646	Gh_D07G2235	formate dehydrogenase	89.2641	66.0527	16.2532	60.1264	73.4083
647	Gh_D07G2236	Uncharacterised protein family (UPF0497)	25.8049	18.4434	22.9825	17.6601	16.6899
648	Gh_D07G2237	Oxidoreductase, zinc-binding dehydrogenase family protein	0	0.0181483	0.948418	1.2051	0
649	Gh_D07G2238	UDP-glucosyl transferase 88A1	2.28697	2.2368	0.52148	0.406203	0.547287
650	Gh_D07G2239	Oxidoreductase, zinc-binding dehydrogenase family protein	0	1.01058	0	0	0.415323
651	Gh_D07G2240	Exonuclease family protein	1.61109	0	0	0	0
652	Gh_D07G2241	GDSL-like Lipase/Acylhydrolase superfamily protein	46.5453	22.9966	6.77918	14.4291	35.24
653	Gh_D07G2242	L-aspartate oxidase	25.2791	6.41306	7.90624	5.53966	10.3168
654	Gh_D07G2243	AT3G27930	1.50236	1.82775	2.22609	4.72526	2.71854
655	Gh_D07G2244	carbonic anhydrase 1	371.434	0.16881	0.133943	0.311879	0.403889
656	Gh_D07G2245	like SEX4 1	11.576	3.54631	0.479522	0.318163	1.29915
657	Gh_D07G2246	Protein of unknown function (DUF1645)	5.74824	4.9667	16.1347	5.00887	7.16832
658	Gh_D07G2247	ATPase E1-E2 type family protein / haloacid dehalogenase-like hydrolase family protein	1.37946	3.64106	3.38083	3.78553	2.1509
659	Gh_D11G1531	vacuolar protein sorting 11	2.96021	4.34598	6.49293	4.30136	6.28376
660	Gh_D11G1532	Sterile alpha motif (SAM) domain-containing protein	0.326699	0.285194	0.941957	0	1.34361
661	Gh_D11G1533	Gh_D11G1533	0.125626	0.4264	0	0	0
662	Gh_D11G1534	histidine kinase 2	0.969621	1.29057	0.0601338	0.187512	0.323725
663	Gh_D11G1535	GRAS family transcription factor	2.61362	9.91449	7.80281	4.20564	3.20871
664	Gh_D11G1536	WRKY DNA-binding protein 2	9.71399	6.87654	36.6658	6.67617	3.20951
665	Gh_D11G1537	DGCR14-related	7.21466	7.02793	38.4783	14.0087	9.14121
666	Gh_D11G1538	Protein kinase superfamily protein	2.07141	0.674334	1.63471	2.00574	0.210202
667	Gh_D11G1539	Thymidine kinase	6.12358	15.1913	0	0.137219	1.70736
668	Gh_D11G1540	RNA-binding (RRM/RBD/RNP motifs) family protein	0.17512	1.48155	0.237491	0.184676	0.335231
669	Gh_D11G1541	Pectin lyase-like superfamily protein	0.0249283	0.315427	0	0	0.0723186
670	Gh_D11G1542	F-box and associated interaction domains-containing protein	0	1.18433	0	0	0
671	Gh_D11G1543	AT5G35732	9.26399	3.33132	0	1.09582	3.26397
672	Gh_D11G1544	F-box and associated interaction domains-containing protein	4.59436	2.12936	0.226618	1.40991	4.24891
673	Gh_D11G1545	F-box and associated interaction domains-containing protein	0	0	0	0	0
674	Gh_D11G1546	F-box and associated interaction domains-containing protein	0	0	0	0	0
675	Gh_D11G1547	arginine methyltransferase 11	0	0	0	0	0
676	Gh_D11G1548	Gh_D11G1548	8.37841	363.521	0.244039	23.5757	110.105
677	Gh_D11G1549	ENHANCED DOWNY MILDEW 2	0.159952	0.15147	0	0.0806501	0.0593239
678	Gh_D11G1550	Peptidase M20/M25/M40 family protein	0	0	0	0	0
679	Gh_D11G1551	IQ-domain 33	0.188529	0.377576	0	0.226811	0.226083
680	Gh_D11G1552	Nucleic acid-binding, OB-fold-like protein	50.7569	33.7078	79.2487	54.1818	48.4765
681	Gh_D11G1553	Protein of unknown function (DUF1664)	1.73658	2.50791	3.36883	4.27208	4.0336
682	Gh_D11G1554	lipid-binding serum glycoprotein family protein	8.65577	9.32791	15.6879	7.84743	7.14712
683	Gh_D11G1555	Beta-ketoacyl synthase	2.57634	2.23235	1.8968	2.69668	2.72984
684	Gh_D11G1556	indole-3-butyric acid response 5	9.87705	8.74855	21.6529	8.79362	9.66998
685	Gh_D11G1557	Gh_D11G1557	0	0	0	0	0
686	Gh_D11G1558	GDSL-like Lipase/Acylhydrolase superfamily protein	0.687813	0.0990897	0	0	0
687	Gh_D11G1559	AT1G62422	0.0246679	1.04137	0.509878	0.392269	0.406279
688	Gh_D11G1560	Pentatricopeptide repeat (PPR) superfamily protein	0.458623	0.456331	0.933353	1.95669	2.45819
689	Gh_D11G1561	adaptin family protein	12.0477	18.7925	22.355	16.1406	20.2615
690	Gh_D11G1562	PDI-like 2-2	28.7567	57.2506	13.4621	95.5281	75.6731
691	Gh_D11G1563	Myzus persicae-induced lipase 1	0	0	0	0	0
692	Gh_D11G1564	Transducin/WD40 repeat-like superfamily protein	12.7893	6.43993	25.6602	11.576	12.1993
693	Gh_D11G1565	ethylene-forming enzyme	5.51566	8.73964	0.129776	0.808613	29.2927
694	Gh_D11G1566	RING/U-box superfamily protein	0.025246	1.58981	0	0	0
695	Gh_D12G0633	protein kinase family protein / peptidoglycan-binding LysM domain-containing protein	0.326266	4.19088	1.00572	0.502159	1.70638
696	Gh_D12G0634	Tetratricopeptide repeat (TPR)-like superfamily protein	1.64056	1.51843	4.73155	4.24099	5.16809
697	Gh_D12G0635	Gh_D12G0635	4.65428	1.64018	8.34951	6.54199	3.88421
698	Gh_D12G0636	Gh_D12G0636	0	0	0	0	0
699	Gh_D12G0637	Gh_D12G0637	0.236328	0	0	0	0
700	Gh_D12G0638	Gh_D12G0638	0.0971196	0.175732	0	0	0
701	Gh_D12G0639	LIM domain-containing protein	9.24406	10.0993	0.822177	4.16528	5.60591
702	Gh_D12G0640	Gh_D12G0640	8.09393	6.49073	7.31797	6.74502	8.62361
703	Gh_D12G0641	BEL1-like homeodomain 2	14.5629	0.320782	26.0682	10.04	6.62338
704	Gh_D12G0642	Protein of unknown function, DUF547	0.441063	1.29573	0	0.568568	1.07968
705	Gh_D12G0643	AT2G23690	11.1076	6.10468	0.88397	0.349476	3.35494
706	Gh_D12G0644	AT2G23690	8.33826	6.44282	0	4.78293	9.43827
707	Gh_D12G0645	AP2/B3-like transcriptional factor family protein	7.43955	13.2713	7.3433	8.22568	8.14904
708	Gh_D12G0646	AP2/B3-like transcriptional factor family protein	0.00419236	0	0	0	0
709	Gh_D12G0647	AP2/B3-like transcriptional factor family protein	0.0151126	0.0160641	0	0	0
710	Gh_D13G0889	P-loop containing nucleoside triphosphate hydrolases superfamily protein	12.5754	9.62284	0	0	0
711	Gh_D13G0890	purple acid phosphatase 26	19.9155	13.8514	12.69	24.3292	23.22
712	Gh_D13G0891	AT2G03830	0.224281	0.558075	0.430488	0	0
713	Gh_D13G0892	BSD domain-containing protein	6.5254	11.1114	2.95115	6.76257	6.86368
714	Gh_D13G0893	Gh_D13G0893	0	0	0	0	0
715	Gh_D13G0894	O-fucosyltransferase family protein	0	0.0145644	0	0	0.0680043
716	Gh_D13G0895	O-fucosyltransferase family protein	0.0773531	0	0.558122	0	0.15702
717	Gh_D13G0896	BES1-interacting Myc-like protein 2	6.83991	9.50903	11.1899	11.1522	8.18607
718	Gh_D13G0897	Phosphatidylinositol 3- and 4-kinase family protein	54.251	16.719	311.631	43.645	48.9798
719	Gh_D13G0898	Gh_D13G0898	0.0822264	0.199349	0	0	0
720	Gh_D13G0899	Chaperone protein htpG family protein	8.73384	3.44513	9.87893	6.61462	8.64178
721	Gh_D13G0900	Armadillo/beta-catenin-like repeat family protein	0.116535	0.485517	0.354814	0.150841	0.158681
722	Gh_D13G0901	Tetratricopeptide repeat (TPR)-like superfamily protein	0.293718	0.180751	2.5499	1.25097	1.37455
723	Gh_D13G0902	basic helix-loop-helix (bHLH) DNA-binding superfamily protein	4.73963	4.57661	6.13547	5.47903	4.2549
